# Supplementary material for: Determination of cadmium, chromium and copper in vegetables of the Solanaceae family using high-resolution continuum source graphite furnace atomic absorption spectrometry and direct solid sample analysis
Source: Royal Society of Chemistry journal article supplement (doi:10.1039/c6ay02594c), 2016-11-23
Supplement: c6ay02594c1.pdf [file c6ay02594c1.pdf]

**Determination of cadmium, chromium and copper in vegetables of the *Solanaceae* family using high-resolution continuum source graphite furnace atomic absorption spectrometry and direct solid sample analysis**

**Electronic Supplementary Information (ESI)**

Tables S.1, S.2 and S.3 show the concentrations of Cd, Cr and Cu of three samples of each vegetable (conventional and organic), which were obtained from different suppliers

Table S.1. Concentration of cadmium in vegetables of the *Solanaceae* family grown in three different locations each, and using both conventional and organic farming and HR-CS SS-GF AAS.

| Vegetable          | Conventional / $\mu\text{g kg}^{-1*}$ |           |           | Organic / $\mu\text{g kg}^{-1*}$ |           |           |
|--------------------|---------------------------------------|-----------|-----------|----------------------------------|-----------|-----------|
|                    | Sample 1c                             | Sample 2c | Sample 3c | Sample 1o                        | Sample 2o | Sample 3o |
| Green Bell pepper  | 37 ± 4                                | 38 ± 3    | 55 ± 2    | 35 ± 3                           | 38 ± 3    | 39 ± 3    |
| Yellow Bell pepper | 11 ± 1                                | 40 ± 1    | 58 ± 6    | 11 ± 1                           | 12 ± 1    | 15 ± 1    |
| Red Bell pepper    | 6.1 ± 0.6                             | 12 ± 1    | 13 ± 2    | 5.0 ± 0.6                        | 7.5 ± 0.5 | 9.5 ± 1   |
| Tomato             | 30 ± 3                                | 72 ± 6    | 78 ± 4    | 19 ± 1                           | 32 ± 1    | 38 ± 4    |
| Potato             | 14 ± 2                                | 45 ± 3    | 55 ± 5    | 12 ± 1                           | 14 ± 1    | 16 ± 2    |
| Eggplant           | 54 ± 2                                | 273 ± 31  | 301 ± 33  | 156 ± 9                          | 159 ± 15  | 174 ± 10  |
| Physalis           | 5.2 ± 0.6                             | 5.3 ± 0.6 | 8.4 ± 0.8 | <LOQ                             | <LOQ      | <LOQ      |
| Red pepper         | 63 ± 6                                | 68 ± 4    | 84 ± 9    | 12 ± 1                           | 51 ± 2    | 52 ± 2    |

LOQ = 2.6 ng g<sup>-1</sup> (\*) Results are expressed as mean ± standard deviation (n=5)

Table S.2. Concentration of chromium in vegetables of the *Solanaceae* family grown in three different locations each, and using both conventional and organic farming and HR-CS SS-GF AAS.

| Vegetable         | Conventional / $\mu\text{g g}^{-1*}$ |                 |                 | Organic / $\mu\text{g g}^{-1*}$ |                 |                 |
|-------------------|--------------------------------------|-----------------|-----------------|---------------------------------|-----------------|-----------------|
|                   | Sample 1c                            | Sample 2c       | Sample 3c       | Sample 1o                       | Sample 2o       | Sample 3o       |
| Green Bell pepper | 0.23 $\pm$ 0.01                      | 0.33 $\pm$ 0.03 | 0.88 $\pm$ 0.09 | 0.44 $\pm$ 0.03                 | 0.71 $\pm$ 0.03 | 1.0 $\pm$ 0.1   |
| Yellow Bellpepper | 0.20 $\pm$ 0.02                      | 0.21 $\pm$ 0.01 | 0.46 $\pm$ 0.03 | 0.23 $\pm$ 0.02                 | 0.26 $\pm$ 0.02 | 0.27 $\pm$ 0.02 |
| Red Bell pepper   | 0.18 $\pm$ 0.01                      | 0.23 $\pm$ 0.02 | 0.34 $\pm$ 0.01 | 0.33 $\pm$ 0.03                 | 0.65 $\pm$ 0.07 | 0.67 $\pm$ 0.07 |
| Tomato            | 0.12 $\pm$ 0.01                      | 0.57 $\pm$ 0.03 | 0.89 $\pm$ 0.08 | 0.063 $\pm$ 0.005               | 0.61 $\pm$ 0.05 | 0.79 $\pm$ 0.07 |
| Potato            | 0.10 $\pm$ 0.01                      | 0.26 $\pm$ 0.01 | 0.4 $\pm$ 0.05  | 0.09 $\pm$ 0.01                 | 0.24 $\pm$ 0.03 | 0.39 $\pm$ 0.02 |
| Eggplant          | 0.36 $\pm$ 0.03                      | 0.46 $\pm$ 0.05 | 0.49 $\pm$ 0.04 | 0.16 $\pm$ 0.02                 | 0.17 $\pm$ 0.01 | 0.33 $\pm$ 0.04 |
| Physalis          | 0.40 $\pm$ 0.05                      | 0.49 $\pm$ 0.06 | 1.1 $\pm$ 0.1   | 0.15 $\pm$ 0.02                 | 0.20 $\pm$ 0.02 | 0.57 $\pm$ 0.05 |
| Red pepper        | 0.42 $\pm$ 0.04                      | 0.49 $\pm$ 0.06 | 0.61 $\pm$ 0.06 | 0.14 $\pm$ 0.02                 | 0.26 $\pm$ 0.02 | 0.71 $\pm$ 0.03 |

(\*) Results are expressed as mean  $\pm$  standard deviation (n=5)

Table S.3. Concentration of copper in vegetables of the *Solanaceae* family grown in three different locations each, and using both conventional and organic farming and HR-CS SS-GF AAS.

| Vegetable         | Conventional / $\mu\text{g g}^{-1*}$ |               |               | Organic / $\mu\text{g g}^{-1*}$ |               |               |
|-------------------|--------------------------------------|---------------|---------------|---------------------------------|---------------|---------------|
|                   | Sample 1c                            | Sample 2c     | Sample 3c     | Sample 1o                       | Sample 2o     | Sample 3o     |
| Green bell pepper | 14 $\pm$ 1                           | 15 $\pm$ 1    | 18 $\pm$ 2    | 7.1 $\pm$ 0.6                   | 8.0 $\pm$ 0.6 | 13 $\pm$ 1    |
| YellowBellpepper  | 6.4 $\pm$ 0.5                        | 8.9 $\pm$ 0.7 | 13 $\pm$ 1    | 6.2 $\pm$ 0.5                   | 7.5 $\pm$ 0.7 | 11 $\pm$ 1    |
| Red Bell pepper   | 6.9 $\pm$ 0.6                        | 8.3 $\pm$ 0.7 | 14 $\pm$ 1    | 11 $\pm$ 1                      | 12 $\pm$ 1    | 13 $\pm$ 1    |
| Tomato            | 4.5 $\pm$ 0.4                        | 4.7 $\pm$ 0.4 | 4.9 $\pm$ 0.3 | 5.3 $\pm$ 0.5                   | 6.1 $\pm$ 0.6 | 8.4 $\pm$ 0.6 |
| Potato            | 4.9 $\pm$ 0.2                        | 5.1 $\pm$ 0.5 | 5.2 $\pm$ 0.5 | 4.8 $\pm$ 0.4                   | 5.4 $\pm$ 0.5 | 6.2 $\pm$ 0.6 |
| Eggplant          | 6.9 $\pm$ 0.6                        | 12 $\pm$ 1    | 13 $\pm$ 1    | 5.2 $\pm$ 0.5                   | 12 $\pm$ 1    | 14 $\pm$ 1    |
| Physalis          | 6.0 $\pm$ 0.6                        | 6.9 $\pm$ 0.6 | 7.4 $\pm$ 0.7 | 7.0 $\pm$ 0.6                   | 11 $\pm$ 1    | 11 $\pm$ 1    |
| Red pepper        | 4.7 $\pm$ 0.4                        | 5.2 $\pm$ 0.4 | 5.3 $\pm$ 0.5 | 6.7 $\pm$ 0.7                   | 7.4 $\pm$ 0.7 | 8.8 $\pm$ 0.8 |

(\*) Results are expressed as mean  $\pm$  standard deviation (n=5)
